# Supplementary material for: A Molecular Insight into Algal-Oomycete Warfare: cDNA Analysis of Ectocarpus siliculosus Infected with the Basal Oomycete Eurychasma dicksonii
Source: PLoS One. 2011 Sep 15;6(9):e24500. doi: 10.1371/journal.pone.0024500 (PMC3174193; doi:10.1371/journal.pone.0024500)
Supplement: Table S1 — Sequences providing insights into Eu. dicksonii infection of E. siliculosus. (XLS) [file pone.0024500.s003.xls]

## Sheet: Sheet1
Supporting Table S1. Sequences providing insights into Eu. dicksonii infection of E. siliculosus
Unigene	Library(s)	Origin	SP	Best blast hit identifier and descriptor	Organism	E value	Domains identified
Pathogen cell surface proteins
403969	old culture	pathogen	None not full length	XP_002903354 mucin-like protein	P. infestans	3e-06	none
1838	dissected and old culture	pathogen	None not full length	XP_002767010 mucin 3A, putative	P. marinus	7e-14	none
500361	dissected	pathogen	None not full length	CAD60685 novel protein similar to	D. rerio	7e-11	SSF49265 Fibronectin type 3 domain 1.3e-12
				human titin
Sequences involved in cell wall interactions
500758	dissected	Pathogen	None not	YP275455 Alginate lyase	P. syringae	0.0613	Pfam08787 Alginate_lyase 2 1.3e-06
			full length
290	young culture and old culture	Host		Esi0495_0002 Mannuronan C-5-epimerase (AlgG)	E. siliculosus	1e-11
500983	dissected	Pathogen	None, not full length	XP0029088843 Glucan 1,3, beta-glycosidase	P. infestans	9e-10	Partial COG5309 exo-beta1-3 glucanase domain 3.74e-06
403087	old culture	Pathogen	None not full length	AAM18483 Exo-1,3,beta glucanase	P. infestans	7e -08	None
881	young culture and old culture	Pathogen	None, not full length	XP_002739250 predicted Cellulase	S. kowalesvskii	1e-07	None
				like protein
400230	old culture	pathogen	None, not Full length	YP_00343827 Cellulase	F. placidus	1e -04	None
1852	dissected, young culture and old culture	host	signal anchor	Esi0004_0105 cellulose synthase	E. siliculosus	1e-130	cl11394 Glyco_tranf_GTA_family1.57e-21
404144	old culture	host	none	Esi0185_0053 cellulose synthase	E. siliculosus	2e-33	cd06421CESA_CelA_like 3.26e-63
301614 and 1623	young culture and old culture	host	none	Esi0231_0017 cellulose synthase	E. siliculosus	5e-46	cl11394 Glyco_tranf_GTA_family 2.31e-26 PLN02400 cellulose synthase1.27e-09
500448	dissected	Pathogen	None, not	ADE62520 chitin synthase 1	S. monoica	9e-09
			Full length
Other potential pathogenicity factors from Eu. dicksonii
400638	old culture	Pathogen	20aa	XP_002899032 conserved	P. infestans	1e-10	Pfam04387 PTPLA domain 7.37e -15
				hypothetical protein
500988	dissected	Pathogen	21aa	XP_001609345 histone deacetylase	B. bovis	8e-26	Pfam00850 Histone deacetylase domain 6e-25
7YP19FM1	dissected	Pathogen	22aa	SP_004287 FKBP_C immunophilin	V. faba	2e-20	Pfam00254 FKBP_C domain 2.88e -15
401409	old culture	Pathogen	None, not	XP_001895426 cyclophilin-type peptidyl prolyl cis-trans isomerase	B. malayi	9e-09	Cd01926 Cyclophilin_ABH
			full length				like domain
5001027	dissected	Pathogen	None, not	NP_001045717 cyclophilin 2	O. sativa	1.8e-41	Cd01926Cyclophilin_ABH like domain
			full length
500504	dissected	Pathogen	None, not	XP_002906896 peptidyl- prolyl cis-trans isomerase	P. infestans	1e-93	Cd01926 Cyclophilin_ABH like domain
			full length
938	young culture and old culture	Pathogen	None, not	XP_002905297 peptidyl- prolyl	P. infestans	7e-51	Cd01926 Cyclophilin_ABHlike domain
			full length	cis-trans isomerase
Eu. dicksonii genes involved in regulation of Growth and Programmed Cell Death
8YN09FM1	dissected	Pathogen	None, not				pfam00628 PHD domain 4e-03 PTHR1033 inhibitor of growth domain 7.3e-13
			full length
400862	old culture	Pathogen	None, not	XP_002899252 putative programmed cell death protein	P. infestans	1e-11	PTHR12626 programmed cell death_4 domain 1.6e-06
			full length
402793	old culture	pathogen	None, not	XP_002899252 putative programmed cell death protein	P. infestans	3e-09	PTHR12626 programmed cell death_4 domain 1.9e-04
			full length
Eu. dicksonii stress responses and nutrient uptake
404084	old culture	pathogen	None, not	NP_001088095 HiGi hypoxia-inducible domain family member 2	X. laevis	5e-08	pfam045588 HIG_I_N response to hypoxia domain1.98e -15
			full length
2138	dissected, young culture and old culture	pathogen	None, not	ATIG48130 thioredoxin peroxidase	A. thaliana	3e-37	none
			full length
4YG14FM1	dissected	pathogen	None, not	PYU1_T001645 thioredoxin-like	P. ultimum	5e-48	PTHR12052 thioredoxin-like
			full length	protein			domain 4A, 4B 2.8e-67
2082	dissected, young culture and old culture	pathogen	None, not	XP_002901765 thioredoxin-like protein	P. infestans	1e-59	PF00085 thioredoxin 2e-30
			full length
500199	dissected	pathogen	19aa	PYUI_T005399 uncharacterised	P. ultimum	7e-74	cd00519 lipase_3_domain 1.67e-05
				protein
1872	dissected and old culture	pathogen	None, not	PITG_20239 hypothetical protein	P. infestans	4e-69	PTHR19229 ABC transporter domain 3e-42
			full length	similar to ATP binding cassette protein
500446	dissected	pathogen	None, not	PITF_01478 ATP-binding cassette	P. infestans	2e-79	Pfam00005 ABC transporter domain 1.9e-08
			full length	sub family F member 2
405589	old culture	pathogen	None, not	none	nd	nd	PF01490 ABC transporter 1.2e-07
			full length
5001136	dissected	pathogen	None, not	PYU1_T006413 choline transporter	P. ultimum	3e-31	PF04515 choline transporter 3.4e-17
			full length	like protein
400113	old culture	pathogen	None, not	PYU1_T01398 HXT-like low affinity	P. ultimum	7e-18	PTHR11600 hexose carrier protein 2.7e-12
			full length	glucose transporter
500485	dissected	pathogen	None, not	none	nd	nd	PTHR11896 Tricarboxylate transport protein 1.3e-51
			full length
405589	old culture	pathogen	None, not	none	nd	nd	PTHR22950 Amino acid transporter 2e-08
			full length
302842	young culture	pathogen	None, not	none	nd	nd	PTHR1941 ATP binding cassette transporter 2e-06
			full length
Host responses to Eu. dicksonii
2091	dissected, young culture and old culture	Host	none	Esi0035_0036 conserved unknown protein	E. siliculosus	e=0	Pfam06212 GRIM_19 1e-17
303625	young culture	Host	none	Esi0000_0481 nuclear movement	E. siliculosus	e=0	cd06467 p23 NUDC_like domain 8e-23
				protein
1359	young culture and old culture	host	23aa	Esi0079_0059 putative protease	E. siliculosus	e=0	IPR000864 protease inhibitor I13 domain 2e-14
				inhibitor
*SP, Signal peptide; nd, not determined.
